# Supplementary material for: Li vacancy-induced ionic conductivity enhancement in Li4B7O12Cl for all-solid-state Li-ion battery application
Source: Royal Society of Chemistry journal article supplement (doi:10.1039/d4nj00414k), 2024-01-01
Supplement: d4nj00414k1.pdf [file d4nj00414k1.pdf]

## Supporting Information

### **Li Vacancy-Induced Enhanced Ionic Conductivity in $\text{Li}_4\text{B}_7\text{O}_{12}\text{Cl}$ for All-solid-state Li-ion Battery**

Shaowei Wang<sup>1</sup>, Zesen Gao<sup>1</sup>, Futing Sun<sup>1</sup>, Yan Yang,<sup>1</sup> Lang Tao,<sup>1</sup> Yunluo Wang<sup>1</sup>,  
Zhiqian Yu<sup>2</sup>, Jianghua Wu<sup>4</sup>, Jingshan Hou<sup>4</sup>, Zhanqiang Liu<sup>3</sup>, Hucheng Song<sup>2</sup>, and  
Haijie Chen<sup>1,\*</sup>

*<sup>1</sup>State Key Laboratory for Modification of Chemical Fibers and Polymer Materials,  
Institute of Functional Materials, College of Materials Science and Engineering,  
Donghua University, Shanghai, 201620, People's Republic of China*

*<sup>2</sup>National Laboratory of Solid-State Microstructures, School of Electronics Science  
and Engineering, Collaborative Innovation Center of Advanced Microstructures,  
Nanjing University, Nanjing, 210093, People's Republic of China*

*<sup>3</sup>Department of Materials Chemistry, Huzhou University, Huzhou 313000, People's  
Republic of China*

*<sup>4</sup>School of Materials Science and Engineering, Shanghai Institute of Technology,  
Shanghai, 201418, China*

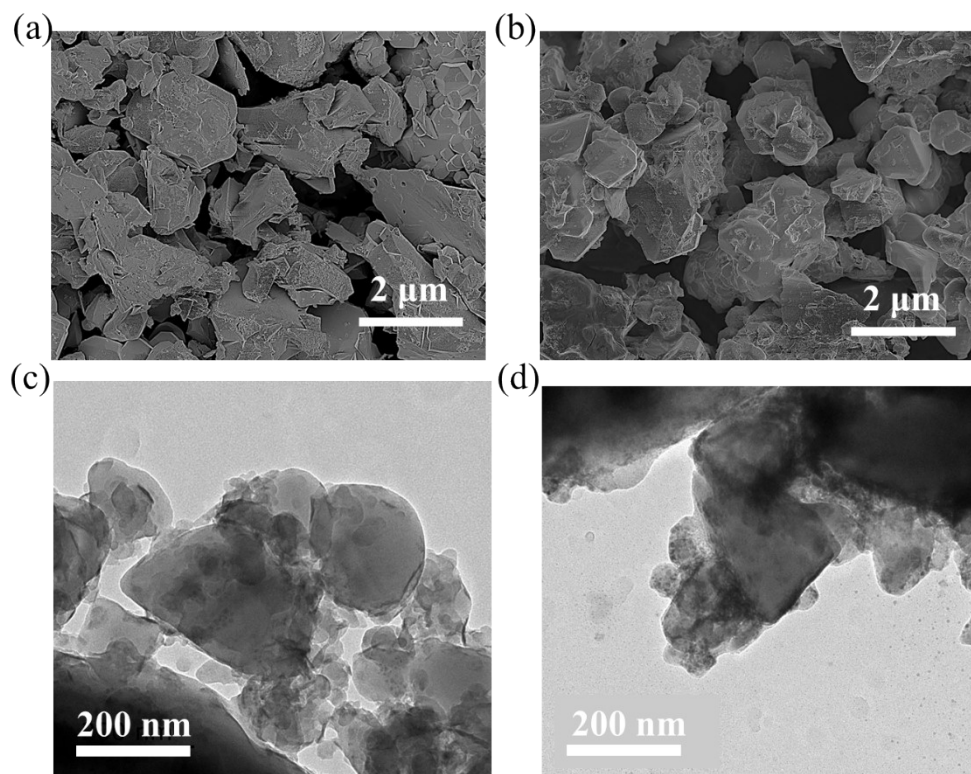

**Figure S1.** (a) The SEM image of  $\text{Li}_4\text{B}_7\text{O}_{12}\text{Cl}$  solid state electrolyte. (b) The SEM image of  $\text{Li}_{3.6}\text{Mg}_{0.2}\text{B}_7\text{O}_{12}\text{Cl}$  solid state electrolyte. (c) The TEM image of  $\text{Li}_4\text{B}_7\text{O}_{12}\text{Cl}$  solid state electrolyte. (d) The TEM image of  $\text{Li}_{3.6}\text{Mg}_{0.2}\text{B}_7\text{O}_{12}\text{Cl}$  solid state electrolyte.

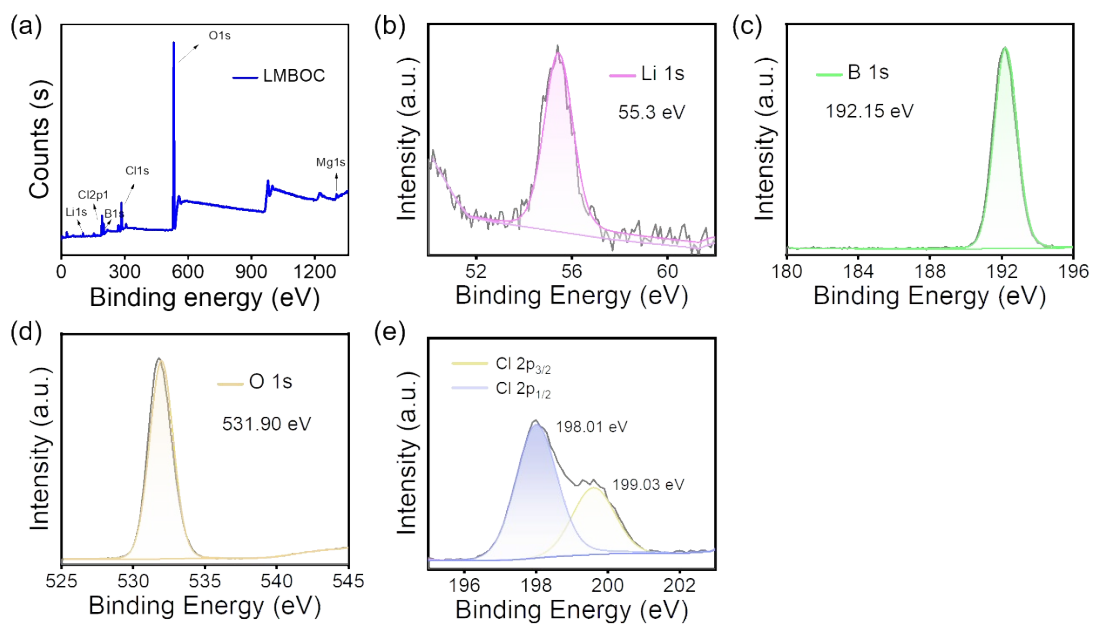

**Figure S2.** (a) XPS full spectrum of  $\text{Li}_{3.6}\text{Mg}_{0.2}\text{B}_7\text{O}_{12}\text{Cl}$  (LMBOC). (b) Li 1s XPS spectra of  $\text{Li}_{3.6}\text{Mg}_{0.2}\text{B}_7\text{O}_{12}\text{Cl}$ . (c) B 1s XPS spectra of  $\text{Li}_{3.6}\text{Mg}_{0.2}\text{B}_7\text{O}_{12}\text{Cl}$ . (d) O 1s XPS spectra of  $\text{Li}_{3.6}\text{Mg}_{0.2}\text{B}_7\text{O}_{12}\text{Cl}$ . (e) Cl 2p XPS spectra of  $\text{Li}_{3.6}\text{Mg}_{0.2}\text{B}_7\text{O}_{12}\text{Cl}$ .

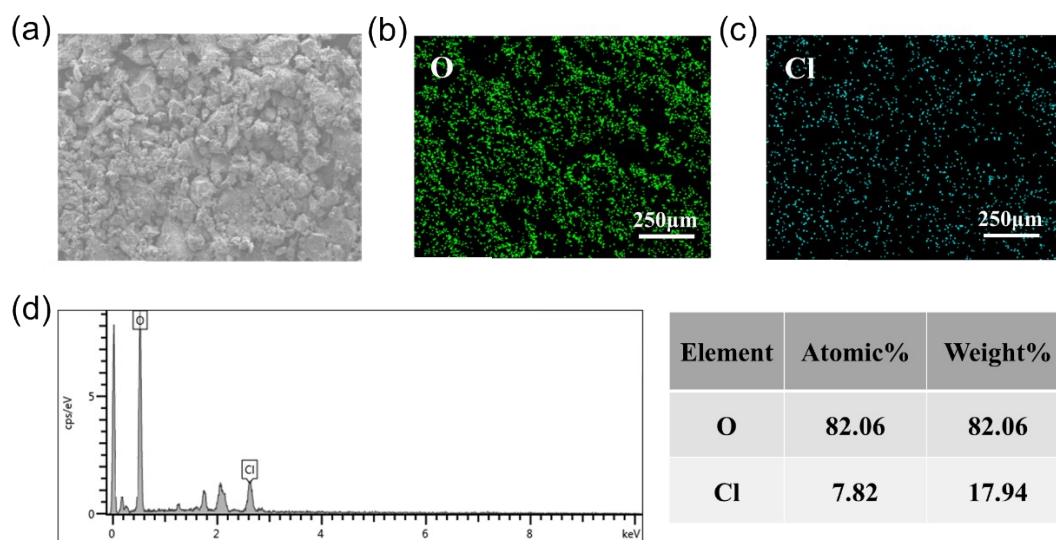

**Figure S3.** (a) The SEM image of  $\text{Li}_4\text{B}_7\text{O}_{12}\text{Cl}$ . (b-c) The corresponding elements EDS mappings of  $\text{Li}_4\text{B}_7\text{O}_{12}\text{Cl}$  electrolyte (O and Cl). (d) The corresponding EDS spectrum at the indicated area and the results of EDS analysis of  $\text{Li}_4\text{B}_7\text{O}_{12}\text{Cl}$ .

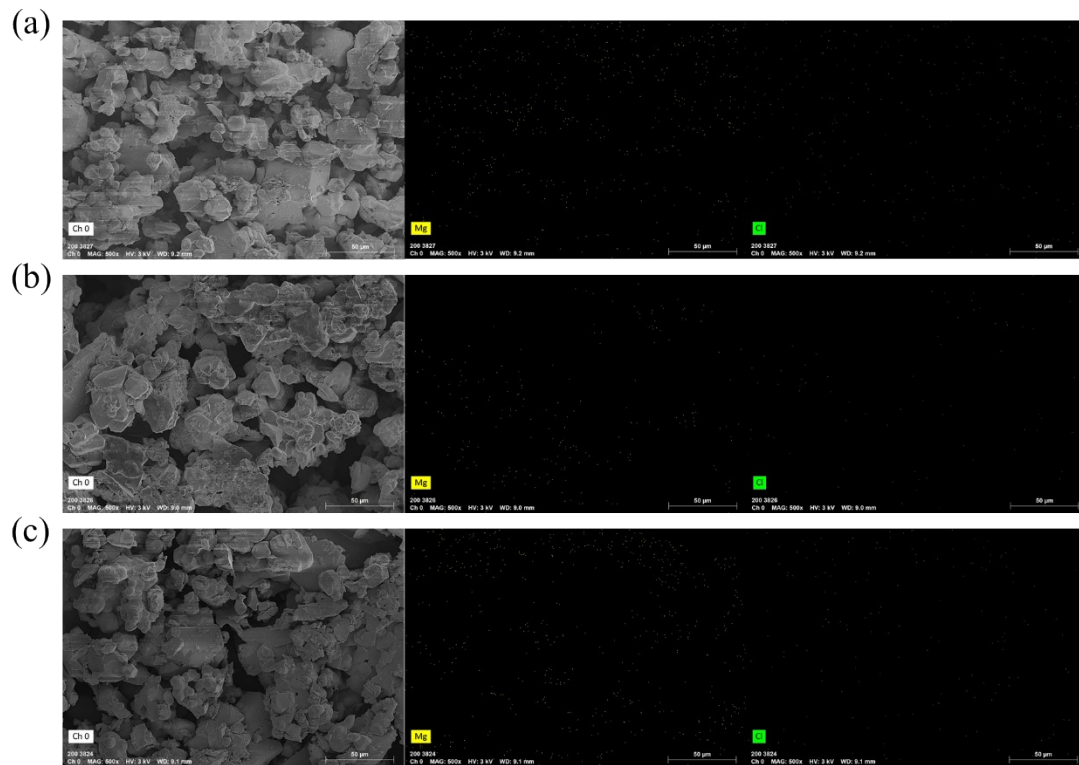

**Figure S4.** (a) The SEM image of  $\text{Li}_{3.9}\text{Mg}_{0.05}\text{B}_7\text{O}_{12}\text{Cl}$  and the corresponding elements EDS mappings of  $\text{Li}_{3.9}\text{Mg}_{0.05}\text{B}_7\text{O}_{12}\text{Cl}$  electrolyte (Mg, O, and Cl). (b) The SEM image of  $\text{Li}_{3.8}\text{Mg}_{0.1}\text{B}_7\text{O}_{12}\text{Cl}$  and the corresponding elements EDS mappings of  $\text{Li}_{3.8}\text{Mg}_{0.1}\text{B}_7\text{O}_{12}\text{Cl}$  electrolyte (Mg, O, and Cl). (c) The SEM image of  $\text{Li}_{3.7}\text{Mg}_{0.15}\text{B}_7\text{O}_{12}\text{Cl}$  and the corresponding elements EDS mappings of  $\text{Li}_{3.7}\text{Mg}_{0.15}\text{B}_7\text{O}_{12}\text{Cl}$  electrolyte (Mg, O, and Cl).

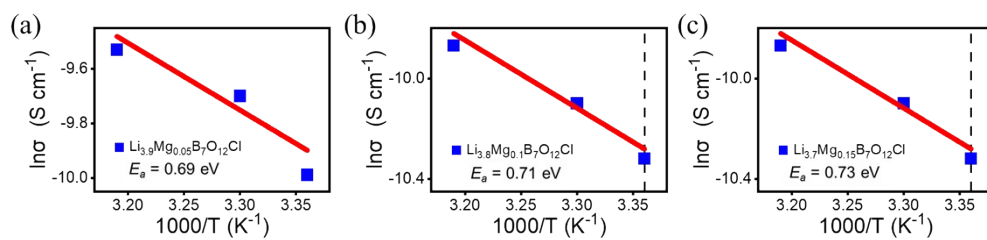

**Figure S5.** (a) Arrhenius diagram of  $\text{Li}_{3.9}\text{Mg}_{0.05}\text{B}_7\text{O}_{12}\text{Cl}$  based on temperature and electrochemical impedance spectroscopy. (b) Arrhenius diagram of  $\text{Li}_{3.8}\text{Mg}_{0.1}\text{B}_7\text{O}_{12}\text{Cl}$  based on temperature and electrochemical impedance spectroscopy. (c) Arrhenius diagram of  $\text{Li}_{3.7}\text{Mg}_{0.15}\text{B}_7\text{O}_{12}\text{Cl}$  based on temperature and electrochemical impedance spectroscopy.

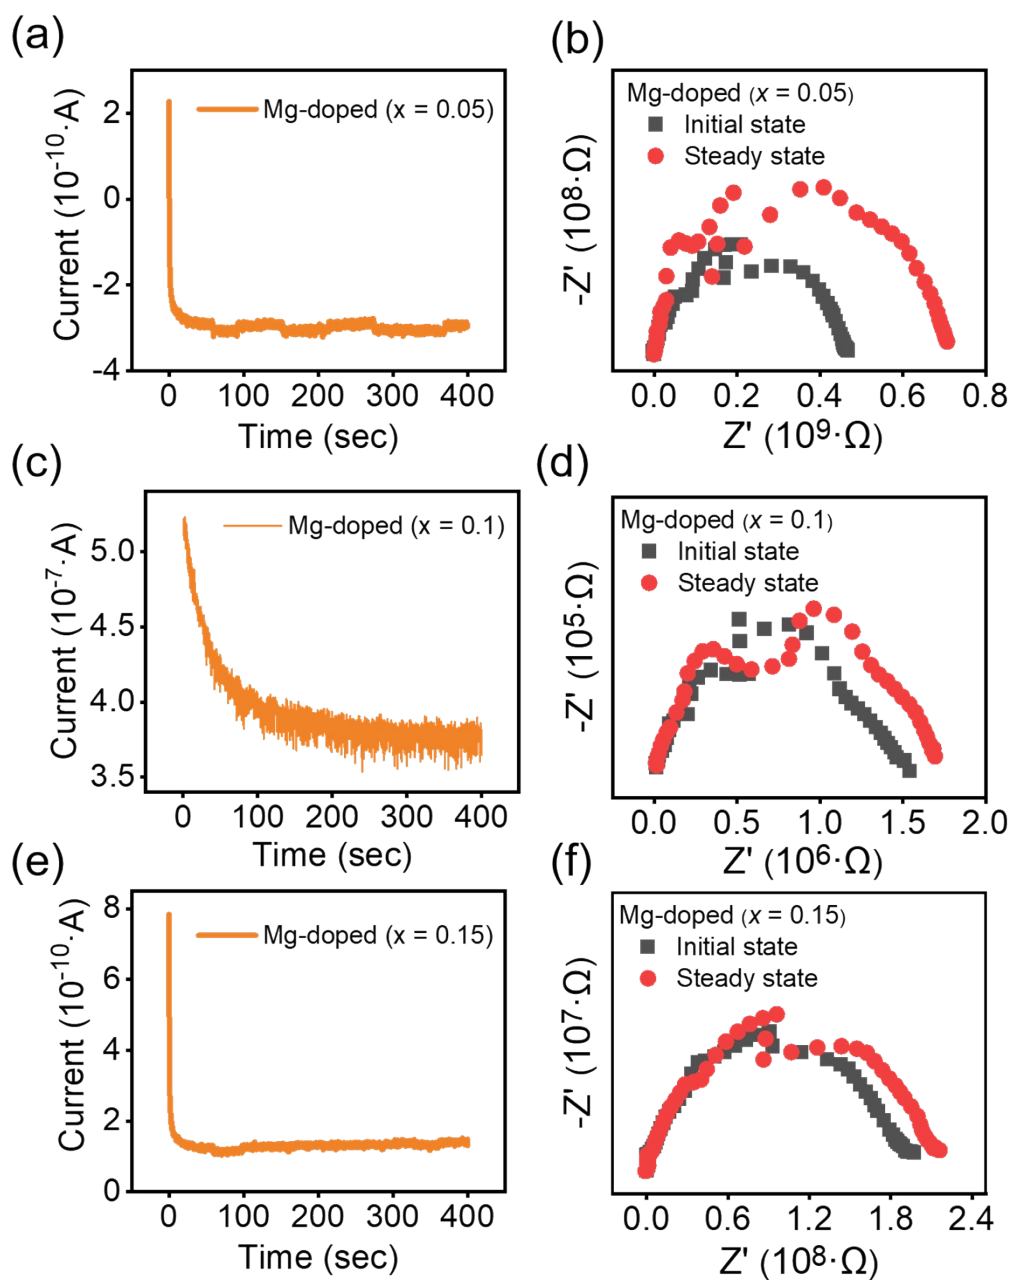

**Figure S6.** Chronoamperometry measurements for the  $\text{Li}_{4-2x}\text{Mg}_x\text{B}_7\text{O}_{12}\text{Cl}$  electrolytes-based lithium symmetric batteries ((a)  $x = 0.05$ , (c)  $x = 0.1$ , and (e)  $x = 0.15$ ). Nyquist impedance plots of the  $\text{Li}_{4-2x}\text{Mg}_x\text{B}_7\text{O}_{12}\text{Cl}$  electrolytes before and after polarization ((b)  $x = 0.05$ , (d)  $x = 0.1$ , and (f)  $x = 0.15$ )).

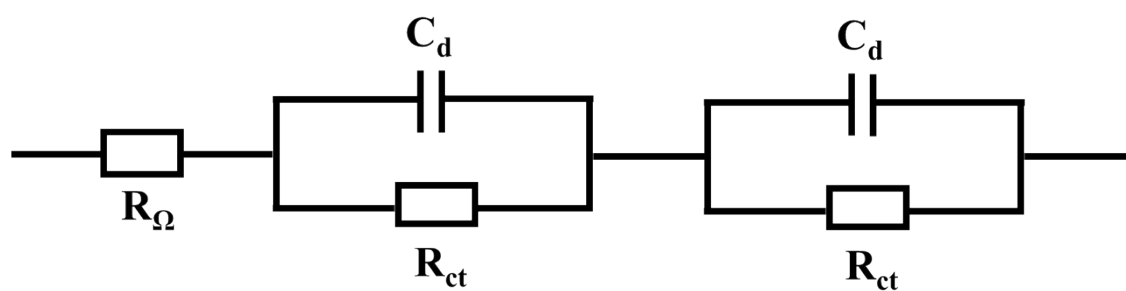

**Figure S7.** The equivalent circuit for fitting the EIS spectra of the Li |  $\text{Li}_{4-2x}\text{Mg}_x\text{B}_7\text{O}_{12}\text{Cl}$

| Li cell.



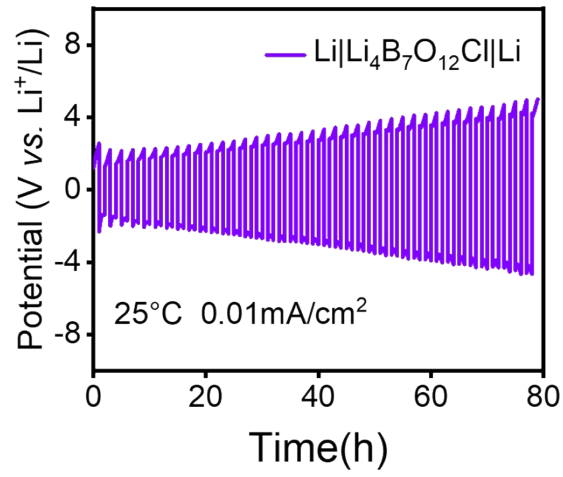

**Figure S8.** The galvanostatic charge–discharge cycle measurement of the (Li|Li<sub>4</sub>B<sub>7</sub>O<sub>12</sub>Cl|Li) cell at a current density of 0.01 mA/cm<sup>2</sup> at room temperature.

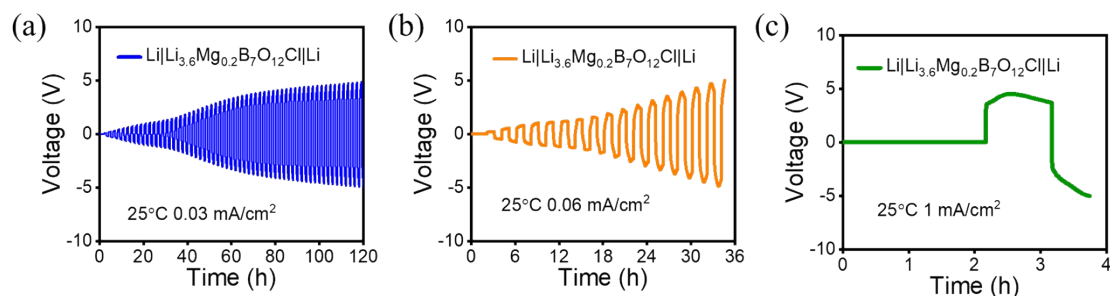

**Figure S9.** (a) The galvanostatic charge–discharge cycle measurement of the  $\text{Li}|\text{Li}_{3.6}\text{Mg}_{0.2}\text{B}_7\text{O}_{12}\text{Cl}|\text{Li}$  cell at a current density of 0.03 mA/cm<sup>2</sup> at room temperature. (b) The galvanostatic charge–discharge cycle measurement of the  $\text{Li}|\text{Li}_{3.6}\text{Mg}_{0.2}\text{B}_7\text{O}_{12}\text{Cl}|\text{Li}$  cell at a current density of 0.06 mA/cm<sup>2</sup> at room temperature. (c) The galvanostatic charge–discharge cycle measurement of the  $\text{Li}|\text{Li}_{3.6}\text{Mg}_{0.2}\text{B}_7\text{O}_{12}\text{Cl}|\text{Li}$  cell at a current density of 1 mA/cm<sup>2</sup> at room temperature.

**Table S1.** Structural data for  $\text{Li}_4\text{B}_7\text{O}_{12}\text{Cl}$ .

| <b>Atom</b> | <b>Wyckoff</b> | <b>Atomic coordinates</b> |         |         | <b><i>Occ.</i></b> | <b>U</b> |
|-------------|----------------|---------------------------|---------|---------|--------------------|----------|
|             |                | x                         | y       | z       |                    |          |
| <b>Cl</b>   | 8b             | 0.25                      | 0.25    | 0.25    | 1                  | 1        |
| <b>B</b>    | 24d            | 0.25                      | 0       | 0       | 1                  | 1        |
| <b>B</b>    | 32e            | 0.10036                   | 0.10036 | 0.10036 | 1                  | 1        |
| <b>O</b>    | 96h            | 0.02252                   | 0.09813 | 0.18172 | 1                  | 1        |
| <b>Li</b>   | 32e            | 0.8708                    | 0.8708  | 0.8708  | 0.25               | 1        |
| <b>Li</b>   | 24c            | 0                         | 0.25    | 0.25    | 1                  | 1        |

**Table S2.** Structural data for  $\text{Li}_{3.6}\text{Mg}_{0.2}\text{B}_7\text{O}_{12}\text{Cl}$  obtained from Rietveld refinement.

| Atom | Wyckoff | Atomic coordinates |        |        | Occ. | U     |
|------|---------|--------------------|--------|--------|------|-------|
|      |         | x                  | y      | z      |      |       |
| Cl   | 8b      | 0.25               | 0.25   | 0.25   | 1    | 0.418 |
| B    | 24d     | 0.25               | 0      | 0      | 1    | 0.406 |
| B    | 32e     | 0.0986             | 0.0986 | 0.0986 | 1    | 0.391 |
| O    | 96h     | 0.0231             | 0.096  | 0.1807 | 1    | 0.398 |
| Li   | 32e     | 0.844              | 0.844  | 0.844  | 0.25 | 0.75  |
| Li   | 24c     | 0                  | 0.25   | 0.25   | 0.8  | 0.548 |
| Mg   | 24c     | 0                  | 0.25   | 0.25   | 0.2  | 0.548 |
| Mg   | 32e     | 0.844              | 0.844  | 0.844  | 0.25 | 0.75  |

**Table S3.** The result of ICP-OES measurement.

| <b>Sample</b>                                                        | <b>Mg content (% , ICP)</b> | <b>Mg precursors content (%)</b> |
|----------------------------------------------------------------------|-----------------------------|----------------------------------|
| <b>Li<sub>3.6</sub>Mg<sub>0.2</sub>B<sub>7</sub>O<sub>12</sub>Cl</b> | 0.198                       | 0.2                              |

$$Mg \text{ Content} = \frac{Mg \text{ Concentration measured by ICP}}{Li \text{ Concentration measured by ICP}} \times 100\%$$

**Table S4.** The results of EDS mappings of  $\text{Li}_{4-2x}\text{Mg}_x\text{B}_7\text{O}_{12}\text{Cl}$  ( $x = 0.05, 0.10, 0.15$ ) electrolyte (Mg, and Cl).

| <b>Material</b>                                                   | <b>Atom ratio</b> |           |
|-------------------------------------------------------------------|-------------------|-----------|
|                                                                   | <b>Mg</b>         | <b>Cl</b> |
| $\text{Li}_{3.9}\text{Mg}_{0.05}\text{B}_7\text{O}_{12}\text{Cl}$ | 4.82              | 95.18     |
| $\text{Li}_{3.8}\text{Mg}_{0.1}\text{B}_7\text{O}_{12}\text{Cl}$  | 9.4               | 90.6      |
| $\text{Li}_{3.7}\text{Mg}_{0.15}\text{B}_7\text{O}_{12}\text{Cl}$ | 13.2              | 86.8      |
